# Supplementary material for: Expression, Clinical Significance, and Functional Prediction of MNX1 in Breast Cancer
Source: PubMed Central journal article supplement (PMC6205149; doi:10.1016/j.omtn.2018.09.014), 2018-09-27
Supplement: mmc1.pdf [file mmc1.pdf]

OMTN, Volume 13

## Supplemental Information

### Expression, Clinical Significance, and Functional Prediction of *MNX1* in Breast Cancer

Tian Tian, Meng Wang, Yuyao Zhu, Wenge Zhu, Tielin Yang, Hongtao Li, Shuai Lin, Cong Dai, Yujiao Deng, Dingli Song, Na Li, Zhen Zhai, and Zhi-Jun Dai

**Supplementary Table2. The enriched pathways**

| Category | Term                                                                                  | P-value  | Count |
|----------|---------------------------------------------------------------------------------------|----------|-------|
| Reactome | R-HSA-1640170: Cell Cycle                                                             | 1.00E-31 | 43    |
| Reactome | R-HSA-69278: Cell Cycle, Mitotic                                                      | 1.00E-30 | 40    |
| KEGG     | hsa04110: Cell cycle                                                                  | 1.00E-23 | 21    |
| Reactome | R-HSA-69205: G1/S-Specific Transcription                                              | 1.00E-15 | 9     |
| Reactome | R-HSA-113510: E2F mediated regulation of DNA replication                              | 1.00E-14 | 10    |
| Reactome | R-HSA-1538133:G0 and Early G1                                                         | 1.00E-13 | 9     |
| Reactome | R-HSA-453279: Mitotic G1-G1/S phases                                                  | 1.00E-13 | 15    |
| Reactome | R-HSA-69273: Cyclin A/B1 associated events during G2/M transition                     | 1.00E-12 | 8     |
| Reactome | R-HSA-2500257: Resolution of Sister Chromatid Cohesion                                | 1.00E-12 | 13    |
| Reactome | R-HSA-69206: G1/S Transition                                                          | 1.00E-12 | 13    |
| KEGG     | hsa04114: Oocyte meiosis                                                              | 1.00E-12 | 13    |
| Reactome | R-HSA-68877: Mitotic Prometaphase                                                     | 1.00E-12 | 13    |
| Reactome | R-HSA-68886: M Phase                                                                  | 1.00E-11 | 18    |
| Reactome | R-HSA-69620: Cell Cycle Checkpoints                                                   | 1.00E-11 | 15    |
| Reactome | R-HSA-156711: Polo-like kinase mediated events                                        | 1.00E-11 | 7     |
| Reactome | R-HSA-6791312: TP53 Regulates Transcription of Cell Cycle Genes                       | 1.00E-11 | 9     |
| Reactome | R-HSA-3700989: Transcriptional Regulation by TP53                                     | 1.00E-10 | 18    |
| Reactome | R-HSA-453274: Mitotic G2-G2/M phases                                                  | 1.00E-10 | 14    |
| Reactome | R-HSA-69242: S Phase                                                                  | 1.00E-10 | 12    |
| Reactome | R-HSA-69306: DNA Replication                                                          | 2.00E-10 | 11    |
| Reactome | R-HSA-69275: G2/M Transition                                                          | 6.31E-10 | 13    |
| Reactome | R-HSA-68882: Mitotic Anaphase                                                         | 7.94E-10 | 13    |
| Reactome | R-HSA-2555396: Mitotic Metaphase and Anaphase                                         | 7.94E-10 | 13    |
| KEGG     | hsa04914: Progesterone-mediated oocyte maturation                                     | 7.94E-10 | 10    |
| Reactome | R-HSA-2467813: Separation of Sister Chromatids                                        | 5.01E-09 | 12    |
| Reactome | R-HSA-69478: G2/M DNA replication checkpoint                                          | 1E-08    | 4     |
| Reactome | R-HSA-157881: Cyclin B2 mediated events                                               | 1E-08    | 4     |
| Reactome | R-HSA-5663220: RHO GTPases Activate Formins                                           | 2.00E-08 | 10    |
| Reactome | R-HSA-195258: RHO GTPase Effectors                                                    | 2.00E-08 | 14    |
| Reactome | R-HSA-176417: Phosphorylation of Emi1                                                 | 2.51E-08 | 4     |
| Reactome | R-HSA-69239: Synthesis of DNA                                                         | 3.16E-08 | 9     |
| Reactome | R-HSA-73886: Chromosome Maintenance                                                   | 5.01E-08 | 9     |
| Reactome | R-HSA-2980767: Activation of NIMA Kinases NEK9, NEK6, NEK7                            | 6.31E-08 | 4     |
| Reactome | R-HSA-2559583: Cellular Senescence                                                    | 1E-07    | 11    |
| Reactome | R-HSA-6804114: TP53 Regulates Transcription of Genes Involved in G2 Cell Cycle Arrest | 1.26E-07 | 5     |
| Reactome | R-HSA-453276: Regulation of mitotic cell cycle                                        | 1.26E-07 | 8     |
| Reactome | R-HSA-174143: APC/C-mediated degradation of cell cycle proteins                       | 1.26E-07 | 8     |
| Reactome | R-HSA-73894: DNA Repair                                                               | 2.00E-07 | 13    |

|          |                                                                                                            |          |    |
|----------|------------------------------------------------------------------------------------------------------------|----------|----|
| Reactome | R-HSA-69481G: 2/M Checkpoints                                                                              | 2.51E-07 | 10 |
| KEGG     | <b>hsa04115: p53 signaling pathway</b>                                                                     | 3.98E-07 | 7  |
| Reactome | R-HSA-5693538: Homology Directed Repair                                                                    | 3.98E-07 | 9  |
| Reactome | R-HSA-75035: Chk1/Chk2(Cds1) mediated inactivation of Cyclin B:Cdk1 complex                                | 7.94E-07 | 4  |
| Reactome | R-HSA-176814: Activation of APC/C and APC/C:Cdc20 mediated degradation of mitotic proteins                 | 0.000001 | 7  |
| Reactome | R-HSA-2559586: DNA Damage/Telomere Stress Induced Senescence                                               | 0.000001 | 7  |
| KEGG     | hsa05166: HTLV-I infection                                                                                 | 1.26E-06 | 11 |
| Reactome | R-HSA-6804116: TP53 Regulates Transcription of Genes Involved in G1 Cell Cycle Arrest                      | 1.26E-06 | 4  |
| Reactome | <b>R-HSA-194315: Signaling by Rho GTPases</b>                                                              | 1.58E-06 | 14 |
| KEGG     | hsa03460: Fanconi anemia pathway                                                                           | 1.58E-06 | 6  |
| Reactome | R-HSA-162658: Golgi Cisternae Pericentriolar Stack Reorganization                                          | 1.58E-06 | 4  |
| Reactome | R-HSA-5693532: DNA Double-Strand Break Repair                                                              | 2.00E-06 | 9  |
| Reactome | R-HSA-69190: DNA strand elongation                                                                         | 2.00E-06 | 5  |
| Reactome | R-HSA-69298: Association of licensing factors with the pre-replicative complex                             | 2.51E-06 | 4  |
| Reactome | R-HSA-5693567: HDR through Homologous Recombination (HR) or Single Strand Annealing (SSA)                  | 3.16E-06 | 8  |
| Reactome | R-HSA-176187: Activation of ATR in response to replication stress                                          | 3.98E-06 | 5  |
| KEGG     | <b>hsa05206: MicroRNAs in cancer</b>                                                                       | 5.01E-06 | 11 |
| Reactome | R-HSA-6783310: Fanconi Anemia Pathway                                                                      | 6.31E-06 | 5  |
| Reactome | R-HSA-606279: Deposition of new CENPA-containing nucleosomes at the centromere                             | 0.00001  | 6  |
| Reactome | R-HSA-774815: Nucleosome assembly                                                                          | 0.00001  | 6  |
| Reactome | R-HSA-176409: APC/C:Cdc20 mediated degradation of mitotic proteins                                         | 1.26E-05 | 6  |
| Reactome | R-HSA-8863678: Neurodegenerative Diseases                                                                  | 1.58E-05 | 4  |
| Reactome | R-HSA-8862803: Deregulated CDK5 triggers multiple neurodegenerative pathways in Alzheimer's disease models | 1.58E-05 | 4  |
| Reactome | R-HSA-176408: Regulation of APC/C activators between G1/S and early anaphase                               | 2.00E-05 | 6  |
| Reactome | R-HSA-2980766: Nuclear Envelope Breakdown                                                                  | 2.00E-05 | 5  |
| Reactome | R-HSA-68874: M/G1 Transition                                                                               | 2.51E-05 | 6  |
| Reactome | R-HSA-69002: DNA Replication Pre-Initiation                                                                | 2.51E-05 | 6  |
| Reactome | R-HSA-113507: E2F-enabled inhibition of pre-replication complex                                            | 3.16E-05 | 3  |
| Reactome | <b>R-HSA-6804756: Regulation of TP53 Activity through Phosphorylation</b>                                  | 3.98E-05 | 6  |
| Reactome | R-HSA-68875: Mitotic Prophase                                                                              | 3.98E-05 | 7  |
| Reactome | R-HSA-68689: CDC6 association with the ORC:origin complex                                                  | 5.01E-05 | 3  |

|          |                                                                          |          |    |
|----------|--------------------------------------------------------------------------|----------|----|
| Reactome | R-HSA-2514853: Condensation of Prometaphase Chromosomes                  | 5.01E-05 | 3  |
| KEGG     | hsa05161: Hepatitis B                                                    | 5.01E-05 | 7  |
| Reactome | R-HSA-2262752: Cellular responses to stress                              | 5.01E-05 | 12 |
| Reactome | R-HSA-68962: Activation of the pre-replicative complex                   | 6.31E-05 | 4  |
| Reactome | R-HSA-176974: Unwinding of DNA                                           | 6.31E-05 | 3  |
| Reactome | R-HSA-69615: G1/S DNA Damage Checkpoints                                 | 0.0001   | 5  |
| Reactome | R-HSA-5685942: HDR through Homologous Recombination (HRR)                | 0.0001   | 5  |
| Reactome | <b>R-HSA-5633007: Regulation of TP53 Activity</b>                        | 0.0001   | 7  |
| Reactome | R-HSA-4419969: Depolymerisation of the Nuclear Lamina                    | 0.000126 | 3  |
| Reactome | R-HSA-8854518: AURKA Activation by TPX2                                  | 0.000126 | 5  |
| Reactome | R-HSA-2299718: Condensation of Prophase Chromosomes                      | 0.000126 | 5  |
| Reactome | R-HSA-69304: Regulation of DNA replication                               | 0.0002   | 5  |
| Reactome | R-HSA-8852276: The role of GTSE1 in G2/M progression after G2 checkpoint | 0.0002   | 5  |
| Reactome | R-HSA-2559580: Oxidative Stress Induced Senescence                       | 0.0002   | 6  |
| Reactome | R-HSA-157579: Telomere Maintenance                                       | 0.000251 | 5  |
| KEGG     | <b>hsa05222: Small cell lung cancer</b>                                  | 0.000251 | 5  |
| Reactome | R-HSA-176412: Phosphorylation of the APC/C                               | 0.000251 | 3  |
| KEGG     | <b>hsa05215: Prostate cancer</b>                                         | 0.000316 | 5  |
| KEGG     | hsa00100: Steroid biosynthesis                                           | 0.000316 | 3  |
| Reactome | R-HSA-2565942: Regulation of PLK1 Activity at G2/M Transition            | 0.000316 | 5  |
| Reactome | R-HSA-5651801: PCNA-Dependent Long Patch Base Excision Repair            | 0.000316 | 3  |
| KEGG     | hsa01522: Endocrine resistance                                           | 0.000398 | 5  |
| Reactome | R-HSA-69473: G2/M DNA damage checkpoint                                  | 0.000398 | 5  |
| KEGG     | hsa00480: Glutathione metabolism                                         | 0.000501 | 4  |
| Reactome | R-HSA-174048: APC/C:Cdc20 mediated degradation of Cyclin B               | 0.000501 | 3  |
| Reactome | R-HSA-110373: Resolution of AP sites via the multiple-nucleotide         | 0.000501 | 3  |
| Reactome | R-HSA-191273: Cholesterol biosynthesis                                   | 0.000501 | 3  |
| Reactome | R-HSA-174417: Telomere C-strand (Lagging Strand) Synthesis               | 0.000501 | 3  |
| Reactome | R-HSA-983189: Kinesins                                                   | 0.000631 | 4  |
| KEGG     | <b>hsa05212: Pancreatic cancer</b>                                       | 0.000794 | 4  |
| KEGG     | hsa04530: Tight junction                                                 | 0.001    | 6  |
| Reactome | R-HSA-180786: Extension of Telomeres                                     | 0.001    | 3  |
| Reactome | R-HSA-420029: Tight junction interactions                                | 0.001    | 3  |
| Reactome | R-HSA-68867: Assembly of the pre-replicative complex                     | 0.001259 | 4  |
| KEGG     | <b>hsa05200: Pathways in cancer</b>                                      | 0.001259 | 9  |
| KEGG     | hsa03410: Base excision repair                                           | 0.001259 | 3  |
| Reactome | R-HSA-69656: Cyclin A:Cdk2-associated events at S phase entry            | 0.001259 | 4  |
| Reactome | R-HSA-3301854: Nuclear Pore Complex (NPC) Disassembly                    | 0.001585 | 3  |
| Reactome | R-HSA-6920: Cyclin E associated events during G1/S transition            | 0.001585 | 4  |
| Reactome | R-HSA-8856688: Golgi-to-ER retrograde transport                          | 0.001585 | 5  |

|          |                                                                                                                     |          |   |
|----------|---------------------------------------------------------------------------------------------------------------------|----------|---|
| Reactome | R-HSA-174184: Cdc20:Phospho-APC/C mediated degradation of Cyclin A                                                  | 0.001585 | 4 |
| Reactome | R-HSA-174178: APC/C:Cdh1 mediated degradation of Cdc20 and other APC/C:Cdh1 targeted proteins in late mitosis/earl  | 0.001585 | 4 |
| Reactome | R-HSA-179419: APC:Cdc20 mediated degradation of cell cycle proteins prior to satisfaction of the cell cycle checkpo | 0.001585 | 4 |
| KEGG     | hsa03030: DNA replication                                                                                           | 0.001585 | 3 |
| Reactome | R-HSA-73884: Base Excision Repair                                                                                   | 0.001995 | 3 |
| Reactome | R-HSA-73933: Resolution of Abasic Sites (AP sites)                                                                  | 0.001995 | 3 |
| KEGG     | <b>hsa05203: Viral carcinogenesis</b>                                                                               | 0.001995 | 6 |
| KEGG     | <b>hsa05219: Bladder cancer</b>                                                                                     | 0.002512 | 3 |
| Reactome | R-HSA-4615885: SUMOylation of DNA replication proteins                                                              | 0.003162 | 3 |
| Reactome | R-HSA-6811434: COPI-dependent Golgi-to-ER retrograde traffic                                                        | 0.003981 | 4 |
| Reactome | R-HSA-5693607: Processing of DNA double-strand break ends                                                           | 0.003981 | 4 |
| KEGG     | <b>hsa05223: Non-small cell lung cancer</b>                                                                         | 0.005012 | 3 |
| Reactome | R-HSA-983231: Factors involved in megakaryocyte development and platelet production                                 | 0.00631  | 5 |
| Reactome | R-HSA-1655829: Regulation of cholesterol biosynthesis by SREBP (SREBF)                                              | 0.00631  | 3 |
| KEGG     | hsa04360: Axon guidance                                                                                             | 0.00631  | 5 |
| Reactome | R-HSA-187577: SCF(Skp2)-mediated degradation of p27/p21                                                             | 0.007943 | 3 |
| Reactome | R-HSA-421270: Cell-cell junction organization                                                                       | 0.007943 | 3 |
| Reactome | R-HSA-1500620: Meiosis                                                                                              | 0.007943 | 4 |
| Reactome | R-HSA-5334118: DNA methylation                                                                                      | 0.01     | 3 |
| Reactome | R-HSA-6811442: Intra-Golgi and retrograde Golgi-to-ER traffic                                                       | 0.01     | 5 |
| Reactome | R-HSA-69580: p53-Dependent G1/S DNA damage checkpoint                                                               | 0.01     | 3 |
| Reactome | R-HSA-69563: p53-Dependent G1 DNA Damage Response                                                                   | 0.01     | 3 |
